# Supplementary material for: MUSEBAQ
Source: Oxford University Press journal article supplement (doi:10.1525/mp.2018.35.3.376), 2018-01-12
Supplement: gemubaq_unpublished_report.docx [file gemubaq_unpublished_report.docx]

Geneva Music Background Questionnaire (GEMUBAQ)

Eduardo Coutinho and Klaus Scherer

Swiss Center for Affective Sciences, Geneva, Switzerland

Unpublished Report, May 2014

Abstract

This report describes work carried out by the authors in preparation for the development of a Music Background Questionnaire intended to serve as a standard instrument to measure important background variables such as music activities, music abilities and attitudes, and frequent music listening experiences. In the course of development we decided to join forces with Tan-Chyuan Chin and Nikki Rickard who had been working on individual differences in music engagements. The result of the joint work is published as *MUSEBAQ: A Modular Tool for Music Research to Assess Musicianship, Musical Capacity, Music Preferences and Motivations for Music Use.*

The purpose of this brief report is to document the work performed in the context of the Music and Emotion project of the Swiss Center of Affective Sciences in 2014.

Introduction

Much of the steadily increasing interest in emotional power of music (Cochrane, Fantini, & Scherer, 2013) is focused on the emotions induced by music in listeners. While a considerable number of studies have been published in this area, progress in is impeded by a) atheoretical approaches, with little cumulativeness of findings, and b) lack of appropriate measurement instruments that are suited to the special nature of music induced emotions. On a) we have made a first effort, proposing the *Routes model*, which provides an inventory of the potential determinants or causal factors that may account for emotional effects of music, proposing a multiplicative relationship of the determinants (Coutinho & Scherer, 2013) - *Experienced Emotion = Effect of Structural features x Performance features x Listener features x Contextual features*.

While model has found much interest, to date there have been only few efforts for empirical work based on it (but see Coutinho & Scherer, submitted a).

On b) our group has developed the Geneva Emotional Music Scale (GEMS, Zentner, Grandjean, & Scherer, 2008), an attempt to create an instrument that is domain specific for this area. Recently, we have extended and adapted GEMS to the GEMIAC (GEneva Music-Induced Affect Checklist), extending it to other types of emotions and simplifying the administration for in situ use (Coutinho & Scherer, submitted b)

First studies have shown viability of this approach (Coutinho & Scherer, submitted a) This suggests that time may be ripe to envisage systematic attempt to empirically examine pertinence of routes model and attempt to isolate the determinants of the emotional power of music and the nature of their interaction. However, a central requirement is the systematic and reliable measurement of the determinants involved:

*Structural features* - Although there is some work to identify the musical structures that may produce emotional responses, this is a complicated matter and there is no standardized inventory or coding system in sight. Music structural features range from microstructural properties of the acoustic signal that very closely describe the features of emanating source and surrounding environment, to a much higher level of structural organization and abstraction, which can convey for instance form and style. The task is complicated because of differences between genres – and thus structural features may need to be determined ad hoc in each study. Furthermore, music structure can also convey meaning outside the auditory domain, as is the case of visio-spatial and motion (e.g., Eitan & Granot 2006), as well as tactile (Eitan & Rothschild 2010) metaphors. Such cross-modal interactions in the perception of music can have a strong influence on emotional responses to music, by conveying emotional meaning across multiple modalities which can lead to more intense and multi-faceted emotional experiences.

*Performer features* -- while treated in glowing detail by music critics, no established roster of judgmental criteria and no agreed upon vocabulary or assessment procedure currently exists. Also there are great differences between genres. Here we must also await progress in future research – and use ad hoc solutions until then. It is important to mention that performance features include two distinct, although intertwined, dimensions, both with a major impact on the perception and induction of emotion. One is intrinsic to the aural experience and corresponds to the way in which a piece of music is executed by a singer and/or one or more instrumentalists. The second dimension refers to the effects of iconic, indexical and symbolic information communicated during the performance. All these aspects, isolated or in combination, directly or indirectly, and in the context or a particular listening situation, affect the emotional experiences of a musical performance (see Scherer & Coutinho, 2013 for more details).

*Contextual features* -- again, there are many hypotheses about importance of certain aspects of the performance and/or listening situation. The location of a performance and/or a listening situation may be a concert hall, church, party, street, car or home. The dominant material surrounding the listener/performer may be wood, glass, stone, metal or none. The particular event may be a wedding, a funeral, or a ball. The music may be transmitted through loudspeakers, headphones or without any technical support. The music may be heard without interruption or the sirens of an ambulance or the coughing of a concert visitor may disturb it. All these features can have an influence on the acoustics, the ambiance of the location, or the behavior of the audience, which in turn may lead to different emotional effects due to objective features of the situation or subjective perceptions of the listeners. So far no established classification system was developed.

*Listener features* – here we refer to the individual and sociocultural identity of the listener and the symbolic coding convention prevalent in a particular culture or subculture. These features can be summarized into musical expertise (acquired implicitly and/or explicitly), including cultural expectations about musical meaning, and stable dispositions (related or unrelated to music, such as age, inference dispositions based on personality, individual differences in memory or physiological reactivity, among many others – see Scherer & Coutinho, 2013 for a through list and supporting evidence). Also here, to our knowledge, no established inventories of musical expertise and relevant stable dispositions, especially the dispositional tendency to react with strong affect to listening to music. It is here that we believe it to be possible to develop a standardized instrument and this report describes the development of the Geneva Music Listener Background Questionnaire (GEMUBAQ).

Concretely, based on the literature we have identified the major dimension of importance, formulated concrete items to measure these and used the result questionnaire in several studies. The paper reports the results of these validation studies.

One of the central issues concerning the modeling of the causal factors that determine emotional effects of music is the relative importance of the different determinants. As the preceding discussion shows, an empirical answer based on a comprehensive study of all determinants in different genres will be a matter of years if not decades. In the interim, we propose to assess the subjective assessment of listeners in terms of their perception of the role of the different determinants on their emotional response. A first study in this direction has been published by Scherer, Schacht & Zentner (2002). Based on this model we have developed a brief checklist for the subjective perception of determinants also presented in this report.

**Method**

The aim of the empirical experiment was to obtain information about people’s musical activities, habits, and skills. Participants were recruited via email and the study was made online. Each participant was asked to answer to a questionnaire containing 41 items organized in 3 question groups as shown in Table 1.

The first group of questions pertained to musical activities. Participants were asked to indicate how often they engage in various musical activities (see Table 1, Question group 1).

The second group of questions aimed at collecting information about musical abilities and attitudes towards music: *Please indicate for each statement how much this is true for you*.

The third question groups focused on the types of experiences (particularly of an affective character) that people live while listening to music: *For each of the items, please indicate how often you have similar feelings*

Four-point scales were used to allow participants to respond quantitatively to each question group: 1) *never or rarely - sometimes - often – frequently*; 2) *not at all – somewhat – much – very much*; 3) *never or rarely - sometimes - often – frequently*.

*Table 1. Questions groups*

| **Question group 1 - Music Activities:**  *For each of the items, please indicate how often you engage in this activity (never or rarely - sometimes - often – frequently):* | **Alias** |
| --- | --- |
| Playing an instrument or singing at a professional level | MusicianPro |
| Playing an instrument or singing as a hobby | MusicianHobby |
| Studying to become a professional musician | MusicianStudent |
| Going to classical concerts | ClassicalMusicConcerts |
| Going to the opera | OperaPerformances |
| Listening to live jazz sessions | JazzConcerts |
| Going to popular concerts (pop, rock, techno, etc.) | PopConcerts |
| Listening to recorded classical music (radio/TV, CDs, DVDs, iPods) | ClassicalMusicListener |
| Listening to recorded popular music (radio/TV, CDs, DVDs, iPods) | PopListener |
| Listening to recorded jazz (radio/TV, CDs, DVDs, iPods) | JazzListener |
| Listening to music while doing other things | BkgrMusic |

| **Question group 2 - Musical ability and attitudes:**  *Please indicate for each statement how much this is true for you (not at all – somewhat – much – very much)* | **Alias** |
| --- | --- |
| I love music | LoveMusic |
| Listening to music is one of my favourite activities | FavouriteActivity |
| I think I have a good musical culture | GoodMusicCulture |
| I find it difficult to concentrate without listening to music | NeedMusic |
| I have a musical talent | MusicalTalent |
| I have a good ear for music | GoodEar |
| I can sing | CanSing |
| I can play one or more musical instruments | PlayInstruments |
| I’m very focused when I listen to my favorite music | Focused |
| I do not understand people who listen constantly to music with portable players | WasteTime1 |
| I think playing or listening to music is a waste of time | WasteTime2 |
| Listening to music fills me with emotion | FeelEmotions |
| When I listen to music, I try to experience what the composer wants to transmit. | EmpathyWithComposer |
| Sometimes I compose music | ComposerAmateur |
| I can very well do things without listening to music. | NoMusic |
| What I like in the song is the musical expression of emotions conveyed by the singers | LoveExpressiveVoice |

| **Question group 3 - Music Listening Experiences:**  *For each of the items, please indicate how often you have similar feelings (never or rarely - sometimes - often – frequently)* | **Alias** |
| --- | --- |
| When I listen to some music I experience strong emotions | FeelStrongEmotions |
| Music produces a feeling of awe and uplift in me | FeelUplifted |
| When I listen to music I calm down and relax | FeelRelaxed |
| Listening to music has a very energizing effect on me | FeelStimulated |
| Some types of music can make me aggressive or belligerent | Agression |
| I sway my body or tap my foot when listening to music | Entrainment |
| I have trouble to suppress my desire to hum along with music | HumAlongMusic |
| I have chills or gooseflesh when listening to moving music | StrongPhysRessp |
| Tears come to my eyes when listening to some pieces of music | Tears |
| I have to fight boredom when listening to music | FeelBored |
| Music produces extremely enjoyable experiences for me | FeelPleasure |
| Music moves me | FeelMoved |
| When listening to music my mood gets better | MoodRegulation |
| While listening to music I think about other things | Think |

Results

We collected a total of 188 complete questionnaires. In order to investigate the underlying relationships between the various questions, we conducted an exploratory factors analysis (EFA) on the questionnaire data. We used the *fa* function from the *psych* (Revelle, 2016) package in R (R Core Team, 2014), with the minimum residual (*minres*) factoring method. We rotated obliquely the original solution using the *oblimin* method.

Horn's Parallel Analysis (PA; Horn, 1965) for common factor analysis was used to determine the number of factors to retain (using *paran* package in R; Dinno, 2012). The scree plot showing the eigenvalue for the unadjusted (original), adjusted (original less estimation bias) and random data sets are shown in Figure 1. PA results suggest retaining 6 factors, which explain 47% of the variance in the data. All item loading on each of the 6 factors in shown in Table 2 (those larger than .50 are shown in bold).

Figure : Parallel analysis

Table : EFA – *minres* method – *oblimin* rotation - 6-factor solution

|  | **F1** | **F2** | **F3** | **F4** | **F5** | **F6** |
| --- | --- | --- | --- | --- | --- | --- |
| Explained Variance | 0.14 | 0.09 | 0.09 | 0.06 | 0.05 | 0.04 |
| Cumulative Variance | 0.14 | 0.24 | 0.32 | 0.38 | 0.43 | 0.47 |
| Agression | 0.354 | -0.039 | 0.029 | 0.107 | -0.200 | 0.024 |
| BkgrMusic | 0.043 | -0.174 | **0.627** | -0.230 | 0.141 | 0.053 |
| CanSing | -0.008 | **0.705** | -0.078 | 0.035 | 0.011 | 0.085 |
| ClassicalMusicConcerts | 0.063 | 0.075 | 0.016 | **0.727** | 0.148 | 0.163 |
| ClassicalMusicListener | 0.076 | 0.004 | 0.045 | **0.571** | 0.085 | 0.185 |
| ComposerAmateur | -0.071 | **0.609** | 0.001 | -0.228 | 0.184 | 0.047 |
| EmpathyWithComposer | 0.275 | 0.201 | 0.184 | 0.212 | -0.012 | -0.112 |
| Entrainment | 0.325 | 0.006 | 0.257 | -0.322 | 0.084 | 0.196 |
| FeelBored | -0.072 | -0.096 | -0.009 | 0.175 | -0.079 | 0.260 |
| FeelEmotions | **0.525** | 0.136 | 0.174 | 0.094 | -0.095 | 0.009 |
| FeelMoved | **0.795** | 0.035 | -0.071 | -0.010 | 0.074 | 0.089 |
| FeelPleasure | **0.574** | 0.016 | 0.137 | -0.016 | 0.043 | -0.012 |
| FeelRelaxed | **0.547** | 0.013 | 0.144 | -0.106 | 0.094 | -0.085 |
| FeelStimulated | **0.592** | -0.055 | 0.235 | -0.098 | 0.114 | -0.111 |
| FeelStrongEmotions | **0.736** | 0.053 | 0.115 | 0.069 | -0.045 | -0.063 |
| FeelUplifted | **0.693** | 0.106 | -0.073 | 0.133 | -0.056 | -0.155 |
| Focused | 0.467 | 0.204 | 0.107 | 0.168 | 0.001 | -0.113 |
| GoodEar | 0.057 | **0.778** | 0.084 | 0.081 | -0.046 | -0.154 |
| GoodMusicCulture | 0.029 | 0.400 | 0.446 | 0.210 | 0.040 | 0.043 |
| HumAlongMusic | 0.458 | 0.117 | 0.106 | -0.230 | -0.070 | 0.003 |
| JazzConcerts | -0.021 | 0.041 | 0.059 | 0.113 | 0.038 | **0.724** |
| JazzListener | 0.125 | 0.075 | 0.089 | 0.046 | -0.091 | **0.687** |
| LoveExpressiveVoice | 0.461 | 0.141 | -0.033 | 0.160 | -0.065 | 0.049 |
| LoveMusic | 0.177 | 0.113 | **0.687** | 0.086 | 0.089 | -0.008 |
| MoodRegulation | **0.531** | -0.254 | 0.228 | -0.098 | 0.114 | -0.005 |
| MusicalTalent | 0.018 | **0.824** | -0.035 | 0.055 | 0.069 | 0.053 |
| MusicFavouriteActivity | 0.121 | 0.173 | **0.687** | 0.044 | 0.038 | 0.077 |
| MusicianHobby | 0.094 | **0.558** | 0.026 | -0.237 | 0.138 | 0.197 |
| MusicianPro | -0.023 | 0.092 | -0.010 | 0.095 | **0.800** | -0.012 |
| MusiciansStudent | -0.008 | 0.053 | -0.004 | 0.106 | **0.825** | -0.019 |
| NeedMusic | -0.102 | -0.010 | **0.514** | 0.175 | -0.082 | 0.028 |
| NoMusic | 0.082 | -0.054 | -0.245 | -0.021 | 0.181 | 0.025 |
| OperaPerformances | 0.050 | -0.009 | -0.026 | **0.709** | 0.278 | 0.000 |
| PlayInstruments | 0.006 | **0.614** | 0.065 | 0.006 | 0.162 | 0.081 |
| PopConcerts | -0.160 | -0.059 | **0.599** | 0.058 | -0.169 | 0.187 |
| PopListener | -0.020 | -0.061 | **0.651** | -0.137 | -0.127 | -0.054 |
| StrongPhysRessp | **0.792** | -0.045 | -0.047 | 0.013 | -0.043 | 0.114 |
| Tears | **0.706** | -0.030 | -0.199 | 0.038 | -0.004 | 0.215 |
| Think | 0.170 | -0.087 | 0.240 | -0.147 | -0.170 | -0.012 |
| WasteTime1 | -0.065 | -0.083 | -0.338 | 0.217 | 0.145 | 0.261 |
| WasteTime2 | -0.195 | 0.031 | -0.148 | 0.042 | -0.134 | 0.261 |

Table : EFA – *minres* method – *oblimin* rotation - 6-factor solution – Only strong loadings

|  | **F1** | **F2** | **F3** | **F4** | **F5** | **F6** |
| --- | --- | --- | --- | --- | --- | --- |
| FeelMoved | 0.795 |  |  |  |  |  |
| StrongPhysResp | 0.792 |  |  |  |  |  |
| FeelStrongEmotions | 0.736 |  |  |  |  |  |
| Tears | 0.706 |  |  |  |  |  |
| FeelUplifted | 0.693 |  |  |  |  |  |
| FeelStimulated | 0.592 |  |  |  |  |  |
| FeelPleasure | 0.574 |  |  |  |  |  |
| FeelRelaxed | 0.547 |  |  |  |  |  |
| MoodRegulation | 0.531 |  |  |  |  |  |
| FeelEmotions | 0.525 |  |  |  |  |  |
| MusicalTalent |  | 0.824 |  |  |  |  |
| GoodEar |  | 0.778 |  |  |  |  |
| CanSing |  | 0.705 |  |  |  |  |
| PlayInstruments |  | 0.614 |  |  |  |  |
| ComposerAmateur |  | 0.609 |  |  |  |  |
| MusicianHobby |  | 0.558 |  |  |  |  |
| MusicFavouriteActivity |  |  | 0.687 |  |  |  |
| LoveMusic |  |  | 0.687 |  |  |  |
| PopListener |  |  | 0.651 |  |  |  |
| BkgrMusic |  |  | 0.627 |  |  |  |
| PopConcerts |  |  | 0.599 |  |  |  |
| NeedMusic |  |  | 0.514 |  |  |  |
| ClassicalMusicConcerts |  |  |  | 0.727 |  |  |
| OperaPerformances |  |  |  | 0.709 |  |  |
| ClassicalMusicListener |  |  |  | 0.571 |  |  |
| MusiciansStudent |  |  |  |  | 0.825 |  |
| MusicianPro |  |  |  |  | 0.800 |  |
| JazzConcerts |  |  |  |  |  | 0.724 |
| JazzListener |  |  |  |  |  | 0.687 |

As can be seen in Table 3, a clear-cut six factor structure emerged from the EFA (there are no cross-loadings; only loadings over 0.5 were considered).

The item loading on F1 clearly indicate an affective factor, that is, all the items loading on this factors describe some sort of affective response (e.g., *music moves me* or *listening to music fills me with emotion*), including strong emotional reactions (*I have chills or gooseflesh when listening to moving music* or *tears come to my eyes when listening to some pieces of music*) and emotional/mood regulation (e.g., *when listening to music my mood gets better* or *when I listen to music I calm down and relax*). This factor was labelled as “**Emotional involvement**”.

The second factor (F2) loadings include various indicators of self-assessed lay musicianship: musical talent, ear for music, capacity for singing and playing musical instruments, and music composition. This factor was labeled as “**Lay Musicianship**”.

Loadings on the third factor (F3) describe music lovers in general, as well as an omnipresence of music in everyday life, and particularly popular music genres.

Factor four (F4), with only three loadings, describes classical music and opera listening and performance attendance habits.

The fifth factor (F5) describes formal musicianship (i.e., explicit music training).

The sixth factor (F6) describes jazz lovers.

Table : Inter-factor correlations

|  | **F1** | **F2** | **F3** | **F4** | **F5** | **F6** |
| --- | --- | --- | --- | --- | --- | --- |
| **F1** | 1 | 0.28 | **0.37** | 0.13 | 0.14 | 0.16 |
| **F2** | 0.28 | 1 | 0.19 | **0.31** | **0.44** | 0.17 |
| **F3** | 0.37 | 0.19 | 1 | -0.1 | 0.02 | 0.06 |
| **F4** | 0.13 | 0.31 | -0.1 | 1 | **0.36** | 0.23 |
| **F5** | 0.14 | 0.44 | 0.02 | 0.36 | 1 | 0.13 |
| **F6** | 0.16 | 0.17 | 0.06 | 0.23 | 0.13 | 1 |

References

Cochrane, T., Fantini, B., & Scherer, K. R. (Eds.). (2013). *The emotional power of music.* Oxford: Oxford University Press.

Coutinho, E. & Scherer, K. R. (under revision a). Introducing the GEneva Music-Induced Affect Checklist (GEMIAC): A Brief Instrument for the Rapid Assessment of Musically Induced Emotions.

Coutinho, E. & Scherer, K. R. (under revision b). The effect of context and audio-visual modality on emotions elicited by a musical performance.

Dinno, A. (2012). paran: Horn's Test of Principal Components/Factors. R package

version 1.5.1. https://CRAN.R-project.org/package=paran

Eitan, Z. and Granot, R. (2006). How music moves: Musical parameters and listeners’ images of motion. *Music Perception*, 23(3), 221-247.

Eitan, Z. and Rothschild, I. (2010). How music touches: Musical parameters and listeners’ audio-tactile metaphorical mappings. *Psychology of Music*, 39(4), 449-467. doi:10.1177/0305735610377592.

Horn J. L. 1965. "A rationale and a test for the number of factors in factor analysis." *Psychometrika*. 30: 179–185

R Core Team (2016). R: A language and environment for statistical computing. R

Foundation for Statistical Computing, Vienna, Austria. URL

https://www.R-project.org/.

Revelle, W. (2016) psych: Procedures for Personality and Psychological Research,

Northwestern University, Evanston, Illinois, USA,

http://CRAN.R-project.org/package=psych Version = 1.6.4.

Scherer, K. R. & Coutinho, E. (2013). How music creates emotion: A multifactorial approach. In T. Cochrane, B. Fantini, & K. R.Scherer (Eds.). *The emotional power of music* (pp. 122-145)*.* Oxford: Oxford University Press.

Scherer, K. R., Zentner, M. R., & Schacht, A. (2002). Emotional states generated by music: A exploratory study of music experts. *Musicae Scientiae. The Journal of the European Society for the Cognitive Sciences of Music*, (Special issue), 149-171.

Zentner, M., Grandjean, D., & Scherer, K. R. (2008). Emotions Evoked by the Sound of Music: Characterization, Classification, and Measurement. *Emotion, 8(4),* 494-521.
